# Supplementary material
Source: publisher site journal article supplement (https://www.dovepress.com/article/372273)
Supplement: Supplementary file 1 [file get_supplementary_file.php]

**Supplemental Table S1.** Comparison of integral hyphema management decisions between responding centers who had known and unknown volumes of cases

| **Hyphema Management** | **Vol. Known (N=32)** | **Vol. Unknown (N=4)** | **P-Value** |
| --- | --- | --- | --- |
| Routinely Administer |  |  |  |
| Topical Steroids | 30 (93.8%) | 4 (100.0%) | 1.000 |
| Topical Cycloplegics | 31 (96.9%) | 3 (75.0%) | 0.212 |
| Anti-Fibrinolytics | 0 (0.0%) | 0 (0.0%) | 1.000 |
| Recommended Activity Restrictions |  |  | 0.648 |
| Partial Bed Rest | 18 (56.2%) | 3 (75.0%) |  |
| Complete Bed Rest | 8 (25.0%) | 0 (0.0%) |  |
| No Activity Limitation | 0 (0.0%) | 0 (0.0%) |  |
| Minor Activity Limitations | 5 (15.6%) | 1 (25.0%) |  |
| Other | 1 (3.1%) | 0 (0.0%) |  |
| Routine Disposition |  |  | 0.687 |
| Discharged to Home | 21 (65.6%) | 4 (100.0%) |  |
| Admitted to Hospital | 8 (25.0%) | 0 (0.0%) |  |
| Other | 3 (9.4%) | 0 (0.0%) |  |
| Discontinue Anti-Coagulation or Anti-Platelet Meds | 14 (43.8%) | 1 (25.0%) | 0.626 |

**Supplemental Table S2.** Comparison of integral hyphema management decisions between responding centers who had high and low volumes of cases

| **Hyphema Management** | **High Vol. (N=19)** | **Low Vol. (N=13)** | **P-Value** |
| --- | --- | --- | --- |
| Routinely Administer |  |  |  |
| Topical Steroids | 17 (89.5%) | 13 (100.0%) | 0.502 |
| Topical Cycloplegics | 18 (94.7%) | 13 (100.0%) | 1.000 |
| Anti-Fibrinolytics | 19(100.0) | 13(100.0) | 1.000 |
| Recommended Activity Restrictions |  |  | 1.000 |
| Partial Bed Rest | 10 (52.6%) | 8 (61.5%) |  |
| Complete Bed Rest | 5 (26.3%) | 3 (23.1%) |  |
| No Activity Limitation | 0 (0.0%) | 0 (0.0%) |  |
| Minor Activity Limitations | 3 (15.8%) | 2 (15.4%) |  |
| Other | 1 (5.3%) | 0 (0.0%) |  |
| Routine Disposition |  |  | 0.734 |
| Discharged to Home | 13 (68.4%) | 8 (61.5%) |  |
| Admitted to Hospital | 5 (26.3%) | 3 (23.1%) |  |
| Other | 1 (5.3%) | 2 (15.4%) |  |
| Discontinue Anti-Coagulation or Anti-Platelet Meds | 11 (57.9%) | 3 (23.1%) | 0.075 |

Supplemental Document 1. Ophthalmic Trauma Preferred Practice Patterns Survey Administered via Qualtrics

Start of Block: General Information

Preface This survey is part of a collaborative effort between the **American Society of Ocular Trauma (ASOT)** and **Asia Pacific Ophthalmic Trauma Society (APOTS)**. It will take approximately 15 minutes to complete. The purpose of this survey is to: Determine the current practice patterns for management of open globe injuries, hyphema, endophthalmitis, orbital fracture, traumatic optic neuropathy, corneal ulcers, and central retinal artery occlusion across major eye trauma centers Determine national, state and institution-based criteria for eye trauma centers

Please answer the following questions regarding your institution's typical management plans for ophthalmic trauma and exclude exceptions. 

 This survey has been approved by the institutional review board at Johns Hopkins University (IRB00199828). If you have any questions or concerns regarding this survey, please contact the principal investigator, Dr. Fasika Woreta (fworeta1@jhmi.edu). Your participation in this survey is completely voluntary; by completing this survey, you are providing your consent to participate in this study.

Q1.2 Name of institution

________________________________________________________________

Q1.3 Is there an eye-specific emergency department (ED) at institution with which you are affiliated?

- Yes
- No

Q1.4 Is the hospital you are affiliated with a designated trauma center (general trauma center, not eye-specific)?

- Yes
- No

Q1.5 Please specify the level of trauma center at your affiliated institution.

- Level I - provides 24-hour availability of all essential specialties, personnel, and equipment, provides the highest level of surgical care to trauma patients
- Level II - provides 24-hour availability of all essential specialties, personnel, and equipment without surgical residency or significant research
- Level III - does not have the full availability of specialists but has resources for emergency resuscitation, surgery, and intensive care of most trauma patients
- Other, please specify in box below ________________________________________________

Q1.6 Does your institution have 24/7 in-house ophthalmology coverage (resident, fellow, or attending)?

- Yes
- No

Q1.7 If there is no in-house ophthalmology provider available 24/7, is there an on-call ophthalmologist that is available to provide care within one hour of notification?

- Yes
- No

Q1.8 For how long have you been practicing ophthalmology after residency? *(years)*

________________________________________________________________

End of Block: General Information

Start of Block: Hyphema

Q3.1 The questions on the following page refer to HYPHEMA MANAGEMENT. Please answer the following questions regarding your institution's typical management plans for ophthalmic trauma and exclude exceptions.

Q3.2 Please specify the range of the approximate number of hyphema (layered or micro) patients seen at your institution per year.

- 0-50
- 51-100
- 101-150
- 151-200
- 201+
- Do not know

Q3.3 Are **topical steroids** routinely administered for **gross (layered) hyphema** management?

- Yes
- No
- Do not know

Q3.4 What **topical steroid(s)** are routinely preferred? (Select all that apply)

- Prednisolone
- Dexamethasone
- Difluprednate
- Other, please specify in box below ________________________________________________

Q3.5 What is the typical duration of topical steroid therapy? *(days)*

________________________________________________________________

Q3.6 Are **topical steroids** routinely administered for **microhyphema (not layered)** management?

- Yes
- No
- Do not know

Q3.7 What **topical steroid(s)** are routinely preferred? (Select all that apply)

- Prednisolone
- Dexamethasone
- Difluprednate
- Other, please specify in box below ________________________________________________

Q3.8 What is the typical duration of topical steroid therapy? *(days)*

________________________________________________________________

Q3.9 Are **topical cycloplegics** routinely administered for patients presenting with hyphema?

- Yes
- No
- Do not know

Q3.10 Which **topical cycloplegics** are routinely administered for patients with hyphema?

- Atropine 1%
- Cyclopentolate 1-2%
- Other, please specify in box below ________________________________________________

Q3.11 Are **anti-fibrinolytics** ever administered to patients for hyphema management?

- Yes
- No
- Do not know

Q3.12 What is the preferred route of **anti-fibrinolytics**? (Select all that apply)

- Oral
- Topical
- Other, please specify in box below ________________________________________________

Q3.13 What activity limitations do you recommend to your patients for hyphema management?

- No activity limitations
- Minor activity limitations
- Partial bed rest
- Complete bed rest
- Other, please specify in box below ________________________________________________
- Do not know

Q3.14 Does your institution ask patients to elevate their head and sleep upright for hyphema management?

- Yes
- No
- Do not know

Q3.15 Is shielding of injured eye for hyphema routinely practiced at your institution?

- Yes
- No
- Do not know

Q3.16 What is the routine ED disposition of hyphema patients?

- Treated and discharged to home
- Admitted to hospital
- Other, please specify in box below ________________________________________________
- Do not know

Q3.17 For patients with layered hyphema and normal intraocular pressure, how often do you follow-up after initial presentation? *(Ex: Daily follow-up for 5 days)*

________________________________________________________________

Q3.18 Is sickle cell trait routinely screened for in all patients presenting with hyphema?

- Yes
- No
- Do not know

Q3.19 Please specify indications for checking for sickle cell trait. *(ex/ African-American descent)*

________________________________________________________________

Q3.20 When does your institution perform anterior chamber washout for hyphema in patients **with sickle cell disease**? *(Ex/ IOP is >24 mmHg for 24 hours)*

________________________________________________________________

Q3.21 When does your institution perform anterior chamber washout for hyphema in patients without sickle cell disease? *(Ex/ IOP is >24 mmHg for 24 hours)*

________________________________________________________________

Q3.22 For patients presenting with hyphema, do you routinely discontinue anti-coagulation or anti-platelet medications if deemed safe by the patient's primary care provider?

- Yes
- No
- Other, please specify in box below ________________________________________________
- Do not know

End of Block: Hyphema
